# Supplementary material
Source: PubMed Central journal article supplement (PMC6351023)
Supplement: ioph-43-01-1474372-s001.pdf [file ioph-43-01-1474372-s001.pdf]

## APPENDIX

**Table I. Systematic Review of the Yield of Temporal Artery Biopsy in Patients with Suspected Giant Cell Arteritis, January 1998 to December 2017 (n=113)**

| Study (Year, Author)    | n    | Yield | Age  | % Female | Country   | ACR $\geq 3$ | Length | % Bilat | Vision Symp | Claudication | GC < 2 wks |
|-------------------------|------|-------|------|----------|-----------|--------------|--------|---------|-------------|--------------|------------|
| 2017, Aranda-Valera (1) | 451  | 0.43  | 81.0 | 0.88     | Spain     | 0.56         |        |         |             |              |            |
| 2017, Bharadwaj (2)     | 409  | 0.18  | 71.3 | 0.69     | UK        |              | 13.2   |         |             |              |            |
| 2017, Bowling (3)       | 129  | 0.13  | 75.0 | 0.75     | UK        | 0.83         | 9.8    | 0.00    |             |              | 0.79       |
| 2017, Gajree (4)        | 715  | 0.35  | 71.0 | 0.69     | UK        |              |        | 0.00    | 0.31        | 0.18         |            |
| 2017, Grossman (5)      | 240  | 0.26  | 72.2 | 0.62     | Israel    |              | 10.7   | 0.00    | 0.24        | 0.11         |            |
| 2017, Ing (6)           | 688  | 0.26  | 73.5 | 0.68     | Canada    | 0.45         | 19.0   | 0.23    | 0.22        |              | 1.00       |
| 2017, Papadakis (7)     | 116  | 0.55  | 76.1 | 0.58     | Germany   |              | 9.4    | 0.00    |             |              |            |
| 2017, Ponte (a) (8)     | 363  | 0.29  |      |          | Portugal  |              |        |         |             |              |            |
| 2017, Rheaume (9)       | 171  | 0.18  | 71.0 | 0.74     | Canada    | 0.80         | 4.3    | 0.00    | 0.50        | 0.28         | 0.50       |
| 2017, Roncato (10)      | 42   | 0.55  | 75.8 | 0.69     | France    |              |        |         | 0.19        |              | 1.00       |
| 2017, Tanveer (a) (11)  | 148  | 0.25  |      |          | UK        |              | 11.8   | 0.03    |             |              |            |
| 2016, Calamia (a) (12)  | 2539 | 0.27  | 74.0 | 0.64     | US        |              |        | 0.50    |             |              |            |
| 2016, Cristaudo (13)    | 50   | 0.04  | 70.0 | 0.65     | Australia | 0.76         |        | 0.04    |             |              | 0.95       |
| 2016, Frost (14)        | 696  | 0.17  | 70.4 | 0.71     | US        |              |        | 0.05    |             |              |            |
| 2016, Hussain (15)      | 96   | 0.16  | 72.0 | 0.69     | UK        | 0.53         | 30.0   |         | 0.34        |              | 0.52       |
| 2016, Jones (a) (16)    | 422  | 0.23  | 72.4 | 0.69     | UK        |              | 13.9   |         |             |              |            |
| 2016, Lariviere (17)    | 24   | 0.25  | 74.0 | 0.67     | France    | 0.63         |        |         | 0.30        | 0.21         | 1.00       |
| 2016, Luqmani (18)      | 381  | 0.39  | 71.1 | 0.72     | UK        |              | 10.0   |         | 0.35        | 0.43         | 1.00       |
| 2016, Neale (a) (19)    | 71   | 0.25  | 75.0 | 0.73     | UK        | 1.00         |        | 0.00    |             |              |            |
| 2016, Oh (20)           | 538  | 0.23  |      | 0.68     | Australia |              | 17.5   | 0.00    |             |              |            |
| 2016, Taylor (a) (21)   | 157  | 0.17  |      |          | UK        | 0.33         |        |         |             |              |            |
| 2016, Yousif (a) (22)   | 17   | 0.24  | 74.0 | 0.70     | UK        | 0.70         |        |         |             |              |            |

|                           |      |      |      |      |           |      |      |      |      |      |      |
|---------------------------|------|------|------|------|-----------|------|------|------|------|------|------|
| 2015, Au (23)             | 96   | 0.21 | 72.0 | 0.60 | Australia |      | 16.0 | 0.00 |      |      |      |
| 2015, Bateman (a) (24)    | 31   | 0.35 |      |      | UK        |      |      |      |      |      | 0.22 |
| 2015, De Lott (25)        | 404  | 0.22 | 73.8 | 0.67 | US        |      |      |      |      |      |      |
| 2015, El-Dairi (26)       | 204  | 0.24 | 71.6 | 0.71 | US        |      |      | 0.06 | 0.26 | 0.17 |      |
| 2015, Fritzlen (a) (27)   | 231  | 0.39 | 77.0 |      | US        |      |      |      | 0.03 | 0.11 |      |
| 2015, Germano (28)        | 105  | 0.33 | 73.4 | 0.70 | Italy     | 0.66 |      |      | 0.09 | 0.24 |      |
| 2015, Han (a) (29)        | 257  | 0.35 |      |      | Canada    |      |      | 0.33 |      |      |      |
| 2015, Lally (30)          | 188  | 0.12 |      | 0.81 | UK        |      |      |      |      |      |      |
| 2015, Le (31)             | 237  | 0.15 | 71.0 | 0.70 | US        | 0.56 | 24.1 | 0.72 |      | 0.32 |      |
| 2015, McKay (32)          | 32   | 0.13 | 68.0 | 0.66 | UK        | 0.81 | 8.3  |      | 0.34 | 0.16 |      |
| 2015, McMurrin (33)       | 56   | 0.13 |      |      | UK        |      | 14.0 |      |      |      |      |
| 2015, Mohammad (34)       | 4216 | 0.20 | 75.9 | 0.68 | Sweden    |      |      |      |      |      |      |
| 2015, Sharma (35)         | 13   | 0.38 | 67.0 |      | India     |      |      |      |      | 0.53 |      |
| 2015, Siemonsen (36)      | 11   | 0.82 | 75.3 | 0.72 | Germany   |      |      |      | 0.55 |      | 1.00 |
| 2015, Sloane (a) (37)     | 471  | 0.26 | 72.0 |      | UK        |      | 15.6 |      |      |      |      |
| 2015, Somogyi (a) (38)    | 143  | 0.10 |      |      | US        |      |      |      |      |      |      |
| 2015, Stacy (39)          | 58   | 0.36 | 74.0 | 0.55 | US        |      | 14.0 | 0.00 | 0.67 | 0.22 |      |
| 2015, Sutton (a) (40)     | 57   | 0.28 |      | 0.70 | UK        | 0.70 |      |      |      |      |      |
| 2014, Cavazza (41)        | 871  | 0.41 |      | 0.26 | Italy     |      |      |      | 0.02 | 0.07 |      |
| 2014, Croft (a) (42)      | 24   | 0.71 |      |      | UK        | 0.41 |      |      |      |      |      |
| 2014, Kaptanis (43)       | 144  | 0.14 | 68.9 | 0.74 | UK        | 0.62 | 6.4  | 0.01 |      |      |      |
| 2014, Klink (44)          | 98   | 0.63 | 71.7 | 0.68 | Germany   | 1.00 |      |      |      |      | 1.00 |
| 2013, Al-Mossawi (a) (45) | 35   | 0.34 | 67.0 |      | UK        |      |      |      |      |      |      |
| 2013, Gonzalez-Lopez (46) | 335  | 0.24 |      | 0.66 | Spain     |      | 7.3  | 0.54 | 0.20 | 0.16 | 1.00 |
| 2013, Ibbett (a) (47)     | 73   | 0.21 | 72.0 | 0.60 | Australia |      |      | 0.66 | 0.43 | 0.28 |      |
| 2013, Kizza (48)          | 744  | 0.29 |      | 0.74 | US        |      |      |      |      |      |      |
| 2013, Pieri (49)          | 50   | 0.06 | 70.0 | 0.76 | UK        |      | 9.0  | 0.00 |      |      |      |
| 2013, Suelves (50)        | 38   | 0.68 | 74.0 | 0.68 | Spain     |      |      |      | 0.37 |      |      |
| 2013, Yates (a) (51)      | 325  | 0.37 | 75.6 | 0.71 | UK        |      |      |      |      | 0.08 |      |
| 2012, Avitabile (52)      | 16   | 0.44 | 70.1 |      | Italy     |      |      |      |      |      |      |
| 2012, Bury D (53)         | 111  | 0.21 | 70.0 | 0.68 | UK        |      |      | 0.01 |      |      | 0.41 |

|                            |      |      |      |      |              |      |      |      |      |      |      |
|----------------------------|------|------|------|------|--------------|------|------|------|------|------|------|
| 2012, Hassouna (a) (54)    | 98   | 0.16 |      | 0.71 | UK           |      |      |      |      |      |      |
| 2012, Pfenninger (55)      | 85   | 0.45 |      | 0.61 | Switzerland  |      |      | 0.00 |      |      |      |
| 2012, Quinn (56)           | 185  | 0.31 | 71.0 | 0.72 | Ireland      | 0.43 |      | 0.01 | 0.14 | 0.18 | 1.00 |
| 2012, Saedon (57)          | 153  | 0.21 | 70.8 | 0.60 | UK           |      | 9.6  |      |      |      |      |
| 2012, Thomassen (58)       | 143  | 0.24 | 71.0 | 0.62 | Netherlands  |      | 9.8  |      | 0.21 | 0.17 |      |
| 2011, Abdul-Rahman (59)    | 363  | 0.19 | 73.0 | 0.71 | New Zealand  |      |      |      | 0.11 | 0.09 |      |
| 2011, Bartlett (60)        | 244  | 0.12 |      |      |              |      |      | 0.68 |      |      |      |
| 2011, Brunso (a) (61)      | 342  | 0.21 | 74.9 | 0.54 | Spain        |      | 12.6 |      |      |      |      |
| 2011, Goslin (62)          | 47   | 0.38 | 70.7 | 0.72 | US           | 0.55 | 14.2 | 0.13 |      |      |      |
| 2011, Lugo (63)            | 138  | 0.24 | 74.0 | 0.76 | US           |      |      |      | 0.26 |      |      |
| 2011, Patel (a) (64)       | 79   | 0.32 |      |      | UK           |      | 11.4 | 0.08 |      |      |      |
| 2011, Tornabene (p) (65)   | 105  | 0.04 | 72.0 | 0.71 | US           | 0.68 |      |      | 0.28 | 0.15 | 0.93 |
| 2011, Verner-Cole (a) (66) | 95   | 0.29 | 81.0 |      | US           |      |      |      |      |      |      |
| 2011, Walvick (67)         | 3001 | 0.15 |      |      | US           |      |      |      |      |      |      |
| 2011, Ypsilantis (68)      | 966  | 0.21 | 74.0 | 0.68 | UK           |      | 10.0 | 0.00 |      |      |      |
| 2010, Cowey (a) (69)       | 60   | 0.35 |      | 0.65 | UK           |      |      |      |      |      |      |
| 2010, Famorca (a) (70)     | 258  | 0.13 |      | 0.79 | Canada       |      |      |      |      |      |      |
| 2010, Maldini (71)         | 284  | 0.16 | 72.2 | 0.64 | France       | 0.25 |      | 0.03 |      |      |      |
| 2010, Manjuka (72)         | 54   | 0.26 |      |      | Australia    |      |      |      |      |      |      |
| 2009, Breuer (73)          | 132  | 0.39 |      |      | Israel       |      |      | 1.00 |      |      | 1.00 |
| 2009, Mader (74)           | 20   | 0.15 |      |      | US           |      |      |      | 0.05 |      |      |
| 2009, Mari (75)            | 278  | 0.28 | 74.0 | 0.65 | Spain        | 0.68 | 10.0 |      | 0.09 | 0.26 | 0.95 |
| 2009, Zhou (76)            | 107  | 0.25 | 72.0 | 0.70 | US           |      |      | 0.10 |      |      | 0.42 |
| 2008, Bley (77)            | 41   | 0.51 | 71.0 | 0.53 | Germany      | 0.76 |      |      |      |      |      |
| 2008, Cetinkaya (78)       | 108  | 0.14 | 72.4 | 0.72 | US           |      | 20.0 | 0.00 | 0.60 | 0.27 | 1.00 |
| 2008, Moutray (79)         | 110  | 0.19 |      | 0.78 | UK           |      |      |      | 0.43 | 0.18 |      |
| 2008, Sintler (80)         | 66   | 0.08 | 70.8 | 0.65 | UK           |      |      |      | 0.24 | 0.08 |      |
| 2007, Chaudhry (81)        | 102  | 0.07 |      | 0.45 | Saudi Arabia |      |      | 0.04 | 0.81 | 0.09 |      |
| 2007, Ramstead (82)        | 141  | 0.26 |      |      | Canada       |      |      |      |      |      |      |
| 2007, Rodriguez-Pla (83)   | 125  | 0.37 | 73.8 | 0.67 | Spain        | 0.57 |      | 0.00 | 0.30 | 0.18 |      |
| 2007, Sharma (84)          | 157  | 0.20 | 76.0 | 0.69 | Australia    |      | 11.8 | 0.01 |      |      |      |

|                            |      |      |      |      |             |      |      |      |      |      |  |      |
|----------------------------|------|------|------|------|-------------|------|------|------|------|------|--|------|
| 2007, Zaragoza Garcia (85) | 23   | 0.26 |      |      | Spain       |      |      |      |      |      |  |      |
| 2006, Davies (86)          | 111  | 0.18 | 71.0 | 0.66 | UK          | 0.68 |      | 0.03 | 0.00 |      |  | 1.00 |
| 2006, Karahaliou (87)      | 49   | 0.37 |      | 0.55 | Greece      | 0.40 |      | 0.00 | 0.13 | 0.05 |  |      |
| 2006, Lenton (88)          | 44   | 0.16 | 74.0 |      | UK          |      |      |      |      |      |  | 1.00 |
| 2006, Mahr (89)            | 1520 | 0.15 | 73.1 | 0.67 | France      |      | 13.3 | 0.05 |      |      |  |      |
| 2006, Su (90)              | 40   | 0.18 |      |      | US          |      | 21.7 |      |      |      |  |      |
| 2005, Chong (91)           | 70   | 0.14 |      |      | Australia   |      | 16.0 | 0.05 |      |      |  |      |
| 2005, Taylor-Gjevre (92)   | 136  | 0.27 | 75.2 | 0.72 | Canada      |      | 17.6 | 0.00 |      |      |  |      |
| 2005, Vianna (93)          | 26   | 0.31 |      |      | Canada      |      |      |      |      |      |  | 1.00 |
| 2004, Reinhard (94)        | 48   | 0.69 | 68.0 |      | Germany     |      |      | 0.00 |      |      |  | 0.95 |
| 2004, Romera-Villegas (95) | 68   | 0.32 | 77.0 | 0.71 | Spain       | 1.00 |      | 0.00 |      | 0.06 |  |      |
| 2004, Varma (96)           | 53   | 0.25 | 69.0 |      | UK          | 0.68 |      | 0.00 |      |      |  |      |
| 2004, Younge (97)          | 1113 | 0.34 | 71.2 | 0.64 | US          | 0.15 | 28.3 | 0.59 | 0.10 | 0.17 |  | 0.89 |
| 2003, Hall, JK (98)        | 201  | 0.16 |      |      | US          |      |      |      |      | 0.18 |  |      |
| 2003, Murgatroyd (99)      | 12   | 0.58 |      |      | UK          |      |      | 0.00 |      |      |  |      |
| 2002, Dalbeth (100)        | 111  | 0.27 |      |      | New Zealand |      | 10.0 | 0.05 |      | 0.14 |  |      |
| 2002, LeSar (101)          | 32   | 0.22 | 73.1 | 0.66 | US          |      |      | 0.75 | 0.25 |      |  |      |
| 2002, Mohamed (102)        | 51   | 0.33 | 69.5 | 0.71 | UK          |      | 10.0 |      | 0.16 | 0.12 |  | 0.95 |
| 2002, Neshet (103)         | 32   | 0.28 |      |      | Israel      |      |      | 0.94 |      |      |  |      |
| 2002, Ray-Chaudhuri (104)  | 11   | 0.82 | 75.0 | 0.73 | UK          | 1.00 | 12.0 |      | 0.27 |      |  | 0.18 |
| 2002, Schmidt (105)        | 127  | 0.17 | 70.0 |      | Germany     | 0.20 |      |      |      | 0.50 |  | 1.00 |
| 2001, Liu (106)            | 121  | 0.17 | 70.0 | 0.71 | US          |      |      |      |      |      |  |      |
| 2000, Chakrabarty (107)    | 172  | 0.14 | 70.0 | 0.75 | UK          |      | 10.0 |      |      |      |  | 1.00 |
| 2000, Danesh-Meyer (108)   | 91   | 0.43 |      |      | US          |      | 33.0 | 1.00 |      |      |  |      |
| 2000, Pless (109)          | 60   | 0.33 | 79.0 |      | US          |      |      | 1.00 |      |      |  |      |
| 2000, Poller (110)         | 102  | 0.34 |      |      | UK          |      | 6.0  | 0.00 |      |      |  |      |
| 1999, Albertini (111)      | 35   | 0.20 |      |      | US          |      | 22.0 | 0.26 |      |      |  |      |
| 1999, Boyev (112)          | 182  | 0.18 |      |      | US          |      | 16.5 | 1.00 |      |      |  |      |
| 1999, Morales-Angulo (113) | 33   | 0.18 | 76.0 | 0.66 | Spain       |      |      | 0.03 | 0.24 | 0.15 |  |      |

### **Legend for Table I**

n: number of temporal artery biopsies performed in each study

Yield: proportion of positive temporal artery biopsies in each study

Age: average age of patients in the study

% Female: proportion of females in the study

Country: country in which the study was performed

NZ: New Zealand

ACR  $\geq 3$ : proportion of patients with American College of Rheumatology score  $\geq 3$

Length: average length of temporal artery biopsy specimens in millimeters

% Bilat: proportion of bilateral temporal artery biopsies performed in the study

Vision Symp: proportion of patients with vision symptoms in each study

Claudication: proportion of patients with jaw claudication

GC  $< 2$  wks: proportion of patients who underwent temporal artery biopsy within 2 weeks of glucocorticoid initiation

Table II. Comments on Selected Article Inclusions and Exclusions Used in the Systematic Review

| Main Article in systematic Review         | Also retained in systematic review             | Related articles that were excluded                                                     | Comment                                                                                                                                                                                                                                                                                                                      |
|-------------------------------------------|------------------------------------------------|-----------------------------------------------------------------------------------------|------------------------------------------------------------------------------------------------------------------------------------------------------------------------------------------------------------------------------------------------------------------------------------------------------------------------------|
| Ing (2017)                                |                                                | Durling (2014) (114)<br>Toren (2016) (115),<br>Weis (2017) (116)<br>Knecht (2015) (117) | Data from the excluded series are incorporated in the Ing paper. The Ottawa studies of Toren, Weis and Durling involved the same series of 259 patients.                                                                                                                                                                     |
| Aranda-Valera (2017)                      |                                                | Garcia Carazo (2013) (118)                                                              | Both are Doppler ultrasound articles are from Hospital La Paz Madrid, Spain and Garcia Carazo is the 2 <sup>nd</sup> author in the Aranda-Valera study. Although the actual study dates are not specified, the 2017 article presents 451 consecutive patients. The 2013 paper is a meeting abstract discussing 267 patients. |
| Rheaume (2017)<br>Patients from 2002-2008 | Famorca (2010)<br>Patients from 2007-2014      |                                                                                         | Both series from Hamilton with only one year of potential overlap between them.                                                                                                                                                                                                                                              |
| Oh (2016)                                 |                                                | Oh (2017)*                                                                              | The original Oh article contained more patient details than the 2017 article on the same series of patients                                                                                                                                                                                                                  |
| Luqmani (2016)                            |                                                | Singh (2014) (119)                                                                      | In these TABUL studies, Singh's 2014 article, was entitled a preliminary report, with Luqmani as a co-author, and significant overlap could not be excluded.                                                                                                                                                                 |
| Kisza (2013)<br>Patients from 1994-2011   | Danesh-Meyer (2000)<br>Patients from 1988-1998 | Murchison (2012) (120)<br>Patients from 2001-2006                                       | In these Wills Eye Neuro-ophthalmology reports, the Murchison study time frame overlapped Kisza completely, but Danesh Meyer had six potential years of non overlapping patients.                                                                                                                                            |
| Bley (2008)                               |                                                | Bley (2005) (121)                                                                       | Apparent overlap of study patients                                                                                                                                                                                                                                                                                           |

|                                               |                                                                                            |                                                                                                                                                                                                                         |                                                                                                                                                                                                                                                                                                                                                                                                                                                                                                                                   |
|-----------------------------------------------|--------------------------------------------------------------------------------------------|-------------------------------------------------------------------------------------------------------------------------------------------------------------------------------------------------------------------------|-----------------------------------------------------------------------------------------------------------------------------------------------------------------------------------------------------------------------------------------------------------------------------------------------------------------------------------------------------------------------------------------------------------------------------------------------------------------------------------------------------------------------------------|
| Ramstead (2007)<br>Patients from<br>1998-2003 | Taylor-Gjevre<br>(2005)<br>Patients from<br>1996-2002                                      |                                                                                                                                                                                                                         | Both series from Sasakatoon, SK with marked overlap in study periods. As such Ramstead's patients from the eye clinic were excluded from the city-wide calculations of Taylor-Gjevre.                                                                                                                                                                                                                                                                                                                                             |
| Younge (2004)<br>Patients from<br>1988-1997   | Calamia<br>Patients from<br>1994-2004<br><br>Fritzlen (2015)<br>Patients from<br>2004-2010 | Kermani (2012)<br>(122)Patients<br>from 2000-2008<br><br>Chandran (2015)<br>(123)<br>(2000-2009)<br><br>Udayakamar<br>(2013)<br>(124)Patients<br>from 2005-2009<br><br>Rieck (2011) (125)<br>Patients from<br>2002-2006 | In these Mayo Clinic articles. Younge reported all Rochester cases from 1988 to 1997. Fritzlen reported Mayo Rochester patients from 2004-2010. Calamia reported Mayo patients from Rochester, Jacksonville and Scottsdale from 1994-2004. Chandran reported Mayo Rochester patients from 2000-2009, specifically Olmsted County. Kermani reported Mayo Rochester patients from 2000-2008. Udayakumar reported Mayo Rochester patients from 2005-2009. Rieck reported his single surgeon series from 2002-2006 at Mayo Rochester. |

\* Oh, L. J., Wong, E., Andrici, J., McCluskey, P., Smith, J. E.H. and Gill, A. J. (), The full blood count as an ancillary test to support the diagnosis of giant cell arteritis. Intern Med J. Accepted Author Manuscript. doi:10.1111/imj.13713 (epub ahead of print)

## CLARIFICATION OF HEALED ARTERITIS

The inclusion of healed arteritis in our group of positive biopsy results requires a caveat.

There are no absolute histopathological features that distinguish healed arteritis from changes due to atherosclerosis, arteriosclerosis or trauma (often referred to as “healed arterial injury”). (126) (127) (128) Indeed, in a study of the interobserver variability in the histopathologic diagnosis of giant cell arteritis, the category of healed arteritis had the greatest interobserver variability (up to 50%).(1) The interpretation of this result as representing healed arteritis is a clinic-pathologic decision made in conjunction with the clinical and serological features of each individual patient. Most studies do not specify the diagnostic criteria used to qualify a case as healed arteritis, but as this diagnosis results in treatment, this was included as a positive biopsy.

## SUM number of cases and biopsies (Stata Code)

```
egen sumn = sum(n)
```

```
egen sumcases = sum(cases)
```

## HISTOGRAM COMMAND (Stata Code)

```
histogram _ES, bin(14) frequency ytitle(Number of studies) xtitle(Proportion of Positive Biopsies)  
xlabel(#20) title(Yield of Temporal Artery Biopsy from 113 Studies)
```

## RISK OF BIAS SUMMARY GRAPH (Stata Code)

```
. tab selectionbias
```

```
Selection |
```



| bias  | Freq. | Percent | Cum.   |
|-------|-------|---------|--------|
| +     | 84    | 74.34   | 74.34  |
| -     | 21    | 18.58   | 92.92  |
| ?     | 8     | 7.08    | 100.00 |
| Total | 113   | 100.00  |        |

. tab performancebias

| Performance bias | Freq. | Percent | Cum.   |
|------------------|-------|---------|--------|
| +                | 107   | 94.69   | 94.69  |
| -                | 4     | 3.54    | 98.23  |
| ?                | 2     | 1.77    | 100.00 |
| Total            | 113   | 100.00  |        |

. tab attritionbias

| Attrition bias | Freq. | Percent | Cum.   |
|----------------|-------|---------|--------|
| +              | 48    | 42.48   | 42.48  |
| -              | 50    | 44.25   | 86.73  |
| ?              | 15    | 13.27   | 100.00 |
| Total          | 113   | 100.00  |        |

. tab reportingbias

| Reporting bias | Freq. | Percent | Cum.   |
|----------------|-------|---------|--------|
| +              | 102   | 90.27   | 90.27  |
| -              | 8     | 7.08    | 97.35  |
| ?              | 3     | 2.65    | 100.00 |
| Total          | 113   | 100.00  |        |

. tab otherbias

| Other bias | Freq. | Percent | Cum.   |
|------------|-------|---------|--------|
| +          | 99    | 87.61   | 87.61  |
| -          | 11    | 9.73    | 97.35  |
| ?          | 3     | 2.65    | 100.00 |
| Total      | 113   | 100.00  |        |

| <b>var1</b>      | <b>low</b> | <b>high</b> | <b>unclear</b> |
|------------------|------------|-------------|----------------|
| Selection_bias   | .7434      | .1858       | .0708          |
| Performance_bias | .9483      | .0354       | .0177          |
| Detection_bias   | .1034      | 0           | .8966          |
| Attrition_bias   | .4248      | .4425       | .1327          |
| Reporting_bias   | .9027      | .0708       | .0265          |
| Other_bias       | .8761      | .0973       | .0265          |

```

generate total = low + high + unclear
generate order = 1 if var1=="Selection_bias"
replace order = 2 if var1=="Performance_bias"
replace order = 3 if var1=="Detection_bias"
replace order = 4 if var1=="Attrition_bias"
replace order = 5 if var1=="Reporting_bias"
replace order = 6 if var1=="Other_bias"

```

```

graph hbar (asis) low high unclear, over (var1, sort(order) ) stack title ("Risk of Bias Summary")
bar(1,color(gs14)) bar(2,color(black)) bar (3,color(gs8))

```

## MEAN & MEDIAN CALCULATIONS

sum\_ES, detail

| ES         |             |          |             |                 |
|------------|-------------|----------|-------------|-----------------|
| -----      |             |          |             |                 |
|            | Percentiles | Smallest |             |                 |
| 1%         | .04         | .0380952 |             |                 |
| 5%         | .1048951    | .04      |             |                 |
| 10%        | .1317829    | .06      | Obs         | 113             |
| 25%        | .1656051    | .0686275 | Sum of Wgt. | 113             |
| <b>50%</b> | <b>.25</b>  |          | <b>Mean</b> | <b>.2768651</b> |
|            |             | Largest  | Std. Dev.   | .1523542        |
| 75%        | .3431373    | .6875    |             |                 |
| 90%        | .4375       | .7083333 | Variance    | .0232118        |

|     |          |          |          |          |
|-----|----------|----------|----------|----------|
| 95% | .6326531 | .8181818 | Skewness | 1.444497 |
| 99% | .8181818 | .8181818 | Kurtosis | 5.457795 |

### 95% confidence interval of the median ( n=113)

[http://www.ucl.ac.uk/ich/short-courses-events/about-stats-courses/stats-rm/Chapter\\_8\\_Content/confidence\\_interval\\_single\\_median](http://www.ucl.ac.uk/ich/short-courses-events/about-stats-courses/stats-rm/Chapter_8_Content/confidence_interval_single_median)

The lower 95% confidence limit is given by the:

$$\frac{n}{2} - \frac{1.96\sqrt{n}}{2} \text{th ranked value}$$

The upper 95% confidence limit is given by the:

$$1 + \frac{n}{2} + \frac{1.96\sqrt{n}}{2} \text{th ranked value}$$

Lower confidence limit

$$\frac{113}{2} - 1.96 \times \frac{\sqrt{113}}{2}$$

= 46.08246...

Which is approximately the 46<sup>th</sup> ranked value =0.2143

*Upper confidence limit*

$$1 + \frac{113}{2} + 1.96 \times \frac{\sqrt{113}}{2}$$
$$= 67.91754\dots$$

*Which is approximately the 68<sup>th</sup> ranked value = 0.2703*

Rank    Yield

|    |          |
|----|----------|
| 40 | .2038217 |
| 41 | .2054795 |
| 42 | .2072072 |
| 43 | .2076023 |
| 44 | .2083333 |
| 45 | .2091503 |
| 46 | .2142857 |
| 47 | .21875   |
| 48 | .2227723 |
| 49 | .2251185 |
| 50 | .2342007 |
| 51 | .2352941 |
| 52 | .2377622 |
| 53 | .2391304 |
| 54 | .2401961 |
| 55 | .241791  |
| 56 | .245283  |
| 57 | .25      |
| 58 | .25      |
| 59 | .2523364 |
| 60 | .2535211 |
| 61 | .2569002 |
| 62 | .2583333 |
| 63 | .2592593 |
| 64 | .2601744 |
| 65 | .2608696 |
| 66 | .2624114 |
| 67 | .2682158 |
| 68 | .2702703 |
| 69 | .2720588 |
| 70 | .2807018 |

### Random Effects Meta-Analysis (Stata 14.2)

On meta-analysis of proportions using random effects analysis with Freeman-Tukey double arcsine transformation and exact confidence intervals, the pooled estimate was

**0.25 (95% confidence interval 0.23, 0.27)**

**I<sup>2</sup> (variation in effect size attributable to heterogeneity) = 92.08%**

metaprop cases n, random ftt cimethod(exact)

| Study | ES   | [95% Conf. Interval] | % Weight |
|-------|------|----------------------|----------|
| 1     | 0.04 | 0.01 0.09            | 0.92     |
| 2     | 0.04 | 0.00 0.14            | 0.77     |
| 3     | 0.06 | 0.01 0.17            | 0.77     |
| 4     | 0.07 | 0.03 0.14            | 0.92     |
| 5     | 0.08 | 0.03 0.17            | 0.84     |
| 6     | 0.10 | 0.06 0.17            | 0.97     |
| 7     | 0.12 | 0.08 0.17            | 1.03     |
| 8     | 0.12 | 0.08 0.18            | 1.00     |
| 9     | 0.13 | 0.04 0.29            | 0.66     |
| 10    | 0.13 | 0.05 0.24            | 0.80     |
| 11    | 0.13 | 0.09 0.18            | 1.03     |
| 12    | 0.13 | 0.08 0.20            | 0.95     |
| 13    | 0.14 | 0.09 0.21            | 0.97     |
| 14    | 0.14 | 0.08 0.22            | 0.93     |
| 15    | 0.14 | 0.09 0.20            | 0.99     |
| 16    | 0.14 | 0.07 0.25            | 0.85     |
| 17    | 0.15 | 0.13 0.17            | 1.10     |
| 18    | 0.15 | 0.03 0.38            | 0.53     |
| 19    | 0.15 | 0.11 0.20            | 1.02     |
| 20    | 0.15 | 0.14 0.17            | 1.11     |
| 21    | 0.16 | 0.09 0.24            | 0.91     |
| 22    | 0.16 | 0.12 0.21            | 1.04     |
| 23    | 0.16 | 0.07 0.30            | 0.74     |
| 24    | 0.16 | 0.11 0.22            | 1.01     |
| 25    | 0.16 | 0.10 0.25            | 0.91     |
| 26    | 0.17 | 0.14 0.19            | 1.09     |

|    |  |      |      |      |      |
|----|--|------|------|------|------|
| 27 |  | 0.17 | 0.10 | 0.24 | 0.94 |
| 28 |  | 0.17 | 0.11 | 0.24 | 0.95 |
| 29 |  | 0.17 | 0.11 | 0.23 | 0.98 |
| 30 |  | 0.17 | 0.07 | 0.33 | 0.72 |
| 31 |  | 0.18 | 0.14 | 0.22 | 1.06 |
| 32 |  | 0.18 | 0.11 | 0.26 | 0.93 |
| 33 |  | 0.18 | 0.13 | 0.25 | 0.99 |
| 34 |  | 0.18 | 0.13 | 0.25 | 1.00 |
| 35 |  | 0.18 | 0.07 | 0.35 | 0.67 |
| 36 |  | 0.19 | 0.12 | 0.28 | 0.93 |
| 37 |  | 0.19 | 0.15 | 0.24 | 1.05 |
| 38 |  | 0.20 | 0.19 | 0.21 | 1.11 |
| 39 |  | 0.20 | 0.08 | 0.37 | 0.68 |
| 40 |  | 0.20 | 0.14 | 0.28 | 0.98 |
| 41 |  | 0.21 | 0.12 | 0.32 | 0.86 |
| 42 |  | 0.21 | 0.14 | 0.29 | 0.93 |
| 43 |  | 0.21 | 0.17 | 0.25 | 1.05 |
| 44 |  | 0.21 | 0.13 | 0.30 | 0.91 |
| 45 |  | 0.21 | 0.15 | 0.28 | 0.98 |
| 46 |  | 0.21 | 0.19 | 0.24 | 1.09 |
| 47 |  | 0.22 | 0.09 | 0.40 | 0.66 |
| 48 |  | 0.22 | 0.18 | 0.27 | 1.06 |
| 49 |  | 0.23 | 0.19 | 0.27 | 1.06 |
| 50 |  | 0.23 | 0.20 | 0.27 | 1.08 |
| 51 |  | 0.24 | 0.07 | 0.50 | 0.49 |
| 52 |  | 0.24 | 0.17 | 0.32 | 0.97 |
| 53 |  | 0.24 | 0.17 | 0.32 | 0.96 |
| 54 |  | 0.24 | 0.18 | 0.30 | 1.01 |
| 55 |  | 0.24 | 0.20 | 0.29 | 1.05 |
| 56 |  | 0.25 | 0.14 | 0.38 | 0.79 |
| 57 |  | 0.25 | 0.18 | 0.33 | 0.97 |
| 58 |  | 0.25 | 0.10 | 0.47 | 0.58 |
| 59 |  | 0.25 | 0.17 | 0.35 | 0.93 |
| 60 |  | 0.25 | 0.16 | 0.37 | 0.85 |
| 61 |  | 0.26 | 0.22 | 0.30 | 1.07 |
| 62 |  | 0.26 | 0.20 | 0.32 | 1.02 |
| 63 |  | 0.26 | 0.15 | 0.40 | 0.79 |
| 64 |  | 0.26 | 0.23 | 0.29 | 1.08 |
| 65 |  | 0.26 | 0.10 | 0.48 | 0.57 |
| 66 |  | 0.26 | 0.19 | 0.34 | 0.97 |
| 67 |  | 0.27 | 0.25 | 0.29 | 1.11 |
| 68 |  | 0.27 | 0.19 | 0.36 | 0.93 |
| 69 |  | 0.27 | 0.20 | 0.35 | 0.96 |
| 70 |  | 0.28 | 0.17 | 0.42 | 0.80 |
| 71 |  | 0.28 | 0.14 | 0.47 | 0.66 |

|     |  |      |      |      |      |
|-----|--|------|------|------|------|
| 72  |  | 0.28 | 0.23 | 0.34 | 1.04 |
| 73  |  | 0.29 | 0.24 | 0.34 | 1.05 |
| 74  |  | 0.29 | 0.26 | 0.32 | 1.09 |
| 75  |  | 0.29 | 0.21 | 0.40 | 0.91 |
| 76  |  | 0.31 | 0.14 | 0.52 | 0.60 |
| 77  |  | 0.31 | 0.25 | 0.39 | 1.00 |
| 78  |  | 0.32 | 0.22 | 0.43 | 0.87 |
| 79  |  | 0.32 | 0.22 | 0.45 | 0.84 |
| 80  |  | 0.33 | 0.22 | 0.47 | 0.82 |
| 81  |  | 0.33 | 0.24 | 0.43 | 0.92 |
| 82  |  | 0.33 | 0.21 | 0.48 | 0.78 |
| 83  |  | 0.34 | 0.31 | 0.36 | 1.10 |
| 84  |  | 0.34 | 0.19 | 0.52 | 0.68 |
| 85  |  | 0.34 | 0.25 | 0.44 | 0.92 |
| 86  |  | 0.35 | 0.31 | 0.39 | 1.09 |
| 87  |  | 0.35 | 0.23 | 0.48 | 0.82 |
| 88  |  | 0.35 | 0.30 | 0.42 | 1.03 |
| 89  |  | 0.35 | 0.19 | 0.55 | 0.65 |
| 90  |  | 0.36 | 0.24 | 0.50 | 0.81 |
| 91  |  | 0.37 | 0.31 | 0.42 | 1.05 |
| 92  |  | 0.37 | 0.23 | 0.52 | 0.77 |
| 93  |  | 0.37 | 0.28 | 0.46 | 0.95 |
| 94  |  | 0.38 | 0.25 | 0.54 | 0.76 |
| 95  |  | 0.38 | 0.14 | 0.68 | 0.42 |
| 96  |  | 0.39 | 0.32 | 0.45 | 1.02 |
| 97  |  | 0.39 | 0.30 | 0.48 | 0.96 |
| 98  |  | 0.39 | 0.34 | 0.44 | 1.06 |
| 99  |  | 0.41 | 0.37 | 0.44 | 1.09 |
| 100 |  | 0.43 | 0.38 | 0.48 | 1.07 |
| 101 |  | 0.43 | 0.33 | 0.54 | 0.90 |
| 102 |  | 0.44 | 0.20 | 0.70 | 0.47 |
| 103 |  | 0.45 | 0.34 | 0.56 | 0.89 |
| 104 |  | 0.51 | 0.35 | 0.67 | 0.72 |
| 105 |  | 0.55 | 0.39 | 0.70 | 0.73 |
| 106 |  | 0.55 | 0.46 | 0.64 | 0.94 |
| 107 |  | 0.58 | 0.28 | 0.85 | 0.40 |
| 108 |  | 0.63 | 0.53 | 0.73 | 0.91 |
| 109 |  | 0.68 | 0.51 | 0.82 | 0.71 |
| 110 |  | 0.69 | 0.54 | 0.81 | 0.76 |
| 111 |  | 0.71 | 0.49 | 0.87 | 0.58 |
| 112 |  | 0.82 | 0.48 | 0.98 | 0.38 |
| 113 |  | 0.82 | 0.48 | 0.98 | 0.38 |

-----+-----  
Random pooled ES | 0.25 0.23 0.27 100.00  
-----+-----



Heterogeneity  $\chi^2 = 1414.23$  (d.f. = 112)  $p = 0.00$   
 $I^2$  (variation in ES attributable to heterogeneity) = 92.08%  
Estimate of between-study variance  $\tau^2 = 0.04$   
Test of  $ES=0$  :  $z = 42.35$   $p = 0.00$

#### IV Het analysis (MetaXL)

=MAInputTable("Fixed effects, heterogeneity", "Prev", "IVhet", Ax:Cy)

where x and y are the row designation in Excel

**Figure I: Forest Plot Pooled estimate =0.23 (95% CI 0.20, 0.27) n=113,  $I^2 =92\%$**

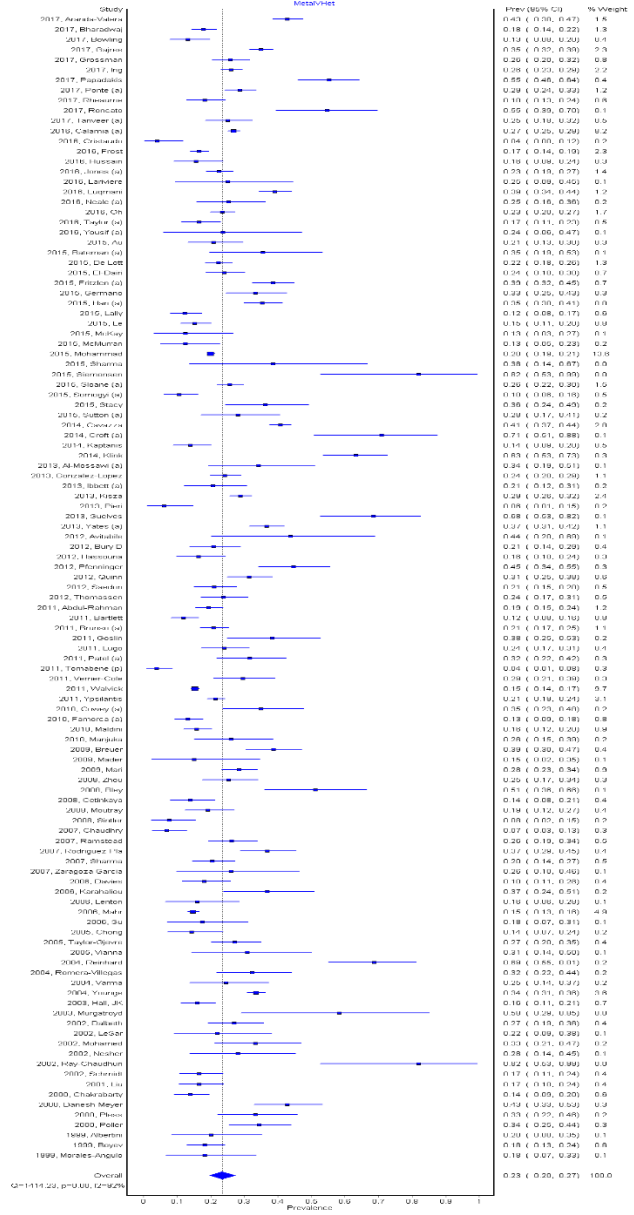

Q=1114.22, p<0.001, I<sup>2</sup>=92.8%

**Figure II: Funnel plot of 113 studies used in Systematic Review**

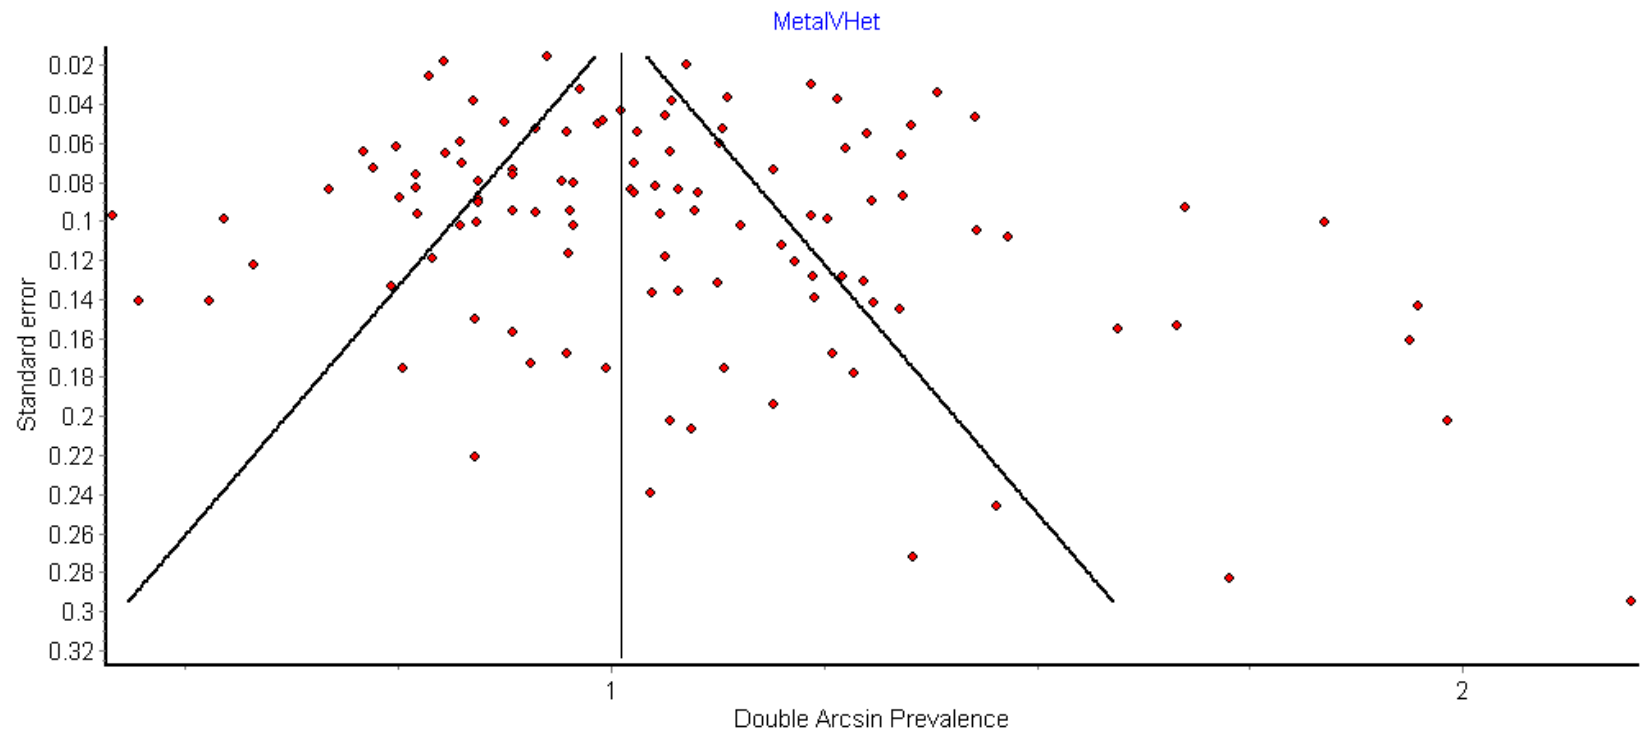

The funnel plot was asymmetric, with minor asymmetry (1.79) on LFK index from doi plot (126).

### Metaregression commands (Stata)

```
metareg _ES variable, wsse (_seES)
```

```
metareg _ES Age, wsse (_seES) graph
```

### Subgroup Analysis

Subgroup analysis is more appropriate for categorical variables rather than continuous variables. However to further explore causes of heterogeneity, subgroup analysis of the predictors were dichotomized at their aggregate mean cut points. Using the IVHet model did *not* show a statistically significant difference in the TAB yield from articles with older versus younger patients, shorter versus longer biopsy lengths, articles published in the first versus second decade of the systematic review, smaller versus larger studies, or studies with a higher versus lower proportion of: jaw claudication, vision symptoms, bilateral TAB, or non-histologic ACRscore >3. Imaging studies, a lower proportion of women than men, and a higher proportion of patients biopsied within 2 weeks of glucocorticoid initiation were associated with a higher TAB yield, at p values <.05. However, the two latter subgroup t-tests would not be statistically significant with Bonferroni correction at p=.005.

Table III: Sub Group Analysis using Inverse Variance Heterogeneity Model

|                       | n   | Mean | Yield of TAB Pooled Estimate | 95% confidence interval | Q (p=0.00 for all) | I <sup>2</sup> | LFK index (asymmetry) | t-test, equal variance p value |
|-----------------------|-----|------|------------------------------|-------------------------|--------------------|----------------|-----------------------|--------------------------------|
| Overall               | 113 | N/A  | 0.23                         | 0.20, 0.27              | 1414.23            | 92%            | 1.79 (minor)          | N/A                            |
| Age < 72.7 years      | 40  | 70.6 | 0.24                         | 0.20, 0.29              | 458.89             | 92%            | 1.59 (minor)          | 0.999                          |
| Age >=72.7 years      | 33  | 75.2 | 0.24                         | 0.17, 0.31              | 439.61             | 93%            |                       |                                |
| %Female < 0.68        | 31  | 0.61 | 0.26                         | 0.19, 0.33              | 483.95             | 94%            | 1.00 (no)             | 0.034                          |
| %Female >=0.68        | 44  | 0.72 | 0.23                         | 0.18, 0.28              | 521.70             | 92%            |                       |                                |
| Avg. Length < 14 mm   | 25  | 10.0 | 0.23                         | 0.17, 0.28              | 337.35             | 92%            | 0.38 (no)             | 0.080                          |
| Avg. Length >= 14 mm  | 17  | 20.0 | 0.26                         | 0.21, 0.31              | 103.9              | 85%            |                       |                                |
| Bilat. TAB < 20%      | 40  | 0.02 | 0.24                         | 0.18, 0.29              | 523.21             | 93%            | 0.06 (no)             | 0.092                          |
| Bilat. TAB >=20%      | 15  | 0.68 | 0.27                         | 0.21, 0.34              | 119.04             | 88%            |                       |                                |
| ACR>=3 in < 62%       | 13  | 0.44 | 0.29                         | 0.21, 0.37              | 175.56             | 93%            | -0.17 (no)            | 0.057                          |
| ACR>=3 in > =62%      | 18  | 0.81 | 0.23                         | 0.15, 0.32              | 187.88             | 91%            |                       |                                |
| Jaw Claud. < 20%      | 21  | 0.13 | 0.28                         | 0.22, 0.34              | 215.04             | 90%            | -1.75 (minor)         | 0.393                          |
| Jaw Claud. >=20%      | 12  | 0.32 | 0.26                         | 0.19, 0.33              | 77.78              | 86%            |                       |                                |
| Vision Symp < 27%     | 21  | 0.16 | 0.30                         | 0.25, 0.35              | 150.61             | 87%            | -1.34 (minor)         | 0.508                          |
| Vision Symp >=27%     | 16  | 0.43 | 0.28                         | 0.16, 0.41              | 222.99             | 93%            |                       |                                |
| Steroids <2wks <85%   | 7   | 0.43 | 0.20                         | 0.13, 0.28              | 29.87              | 80%            | 0.38 (no)             | 0.020                          |
| Steroids <2 wks >=85% | 21  | 0.98 | 0.29                         | 0.20, 0.38              | 285.45             | 93%            |                       |                                |
| Study Size < 273      | 88  | 96   | 0.24                         | 0.21, 0.27              | 719.54             | 88%            | 1.79 (minor)          | 0.195                          |
| Study Size >=273      | 25  | 897  | 0.23                         | 0.19, 0.28              | 694.10             | 97%            |                       |                                |
| Non-imaging Study     | 96  | N/A  | 0.23                         | 0.19, 0.27              | 1255.17            | 92%            | 1.79 (minor)          | 0.001                          |
| Imaging Study         | 17  | N/A  | 0.34                         | 0.23, 0.45              | 95.80              | 84%            |                       |                                |
| Studies: 1988-2007    | 33  | N/A  | 0.23                         | 0.15, 0.31              | 303.74             | 89%            | 1.79 (minor)          | 0.401                          |
| Studies: 2008-2017    | 80  | N/A  | 0.24                         | 0.19, 0.28              | 1109.23            | 93%            |                       |                                |

n = # of studies

%Female = proportion of females in study

Bilat. TAB = bilateral temporal artery biopsy

ACR>=3 = American College of Rheumatology Score of 3 or greater

Jaw Claud = jaw claudication

Vision Symp = Vision symptoms

Steroids < 2 weeks: proportion of patients who were biopsied within the 2-week corticosteroid treatment window

N/A = not applicable

**Multivariable Meta-regression of 15 studies: (Age, %female, Vision Symptoms, Steroid duration prior to biopsy)**

When the statistically significant predictors from univariate metaregression (age, imaging study) and subgroup analysis (sex, steroid duration, imaging) were combined in a multivariable metaregression, 15 studies could be analyzed, but none of the predictors was statistically significant.

```
metareg _ES avg_age fetomaratio imagestudy steroids252 , wsse (_seES)
```

|                                                |               |   |         |
|------------------------------------------------|---------------|---|---------|
| Meta-regression                                | Number of obs | = | 21      |
| REML estimate of between-study variance        | tau2          | = | .01495  |
| % residual variation due to heterogeneity      | I-squared_res | = | 64.39%  |
| Proportion of between-study variance explained | Adj R-squared | = | -32.95% |
| Joint test for all covariates                  | Model F(4,16) | = | 0.60    |
| With Knapp-Hartung modification                | Prob > F      | = | 0.6714  |

---

| _ES         | Coef.     | Std. Err. | t     | P> t  | [95% Conf. Interval] |
|-------------|-----------|-----------|-------|-------|----------------------|
| avg_age     | .0207356  | .0239508  | 0.87  | 0.399 | -.0300377 .071509    |
| fetomaratio | -.8894943 | 1.12986   | -0.79 | 0.443 | -3.284691 1.505703   |
| imagestudy  | .0864345  | .1233424  | 0.70  | 0.494 | -.1750397 .3479087   |
| steroids252 | .0671905  | .1752626  | 0.38  | 0.706 | -.3043497 .4387306   |
| _cons       | -.6743519 | 1.903786  | -0.35 | 0.728 | -4.710199 3.361495   |

---

**There are WIDE fluctuations in the meta-regression coefficients depending on the chosen model**

```
metareg _ES imagestudy n era avg_age fetomaratio visionsympt steroids252 , wsse (_seES )
```

|                                         |               |   |        |
|-----------------------------------------|---------------|---|--------|
| Meta-regression                         | Number of obs | = | 15     |
| REML estimate of between-study variance | tau2          | = | .01573 |

```

% residual variation due to heterogeneity      I-squared_res = 69.38%
Proportion of between-study variance explained  Adj R-squared = -204.95%
Joint test for all covariates                 Model F(7,7) = 0.97
With Knapp-Hartung modification              Prob > F = 0.5149

```

| _ES         | Coef.     | Std. Err. | t     | P> t         | [95% Conf. Interval] |
|-------------|-----------|-----------|-------|--------------|----------------------|
| imagestudy  | .0688246  | .1319523  | 0.52  | 0.618        | -.2431929 .3808422   |
| n           | .0001984  | .0001714  | 1.16  | 0.285        | -.0002068 .0006036   |
| era         | -.2360274 | .1473591  | -1.60 | 0.153        | -.5844762 .1124214   |
| avg_age     | .0824388  | .0382439  | 2.16  | <b>0.068</b> | -.0079935 .1728712   |
| fetomaratio | 4.626139  | 2.685168  | 1.72  | 0.129        | -1.723274 10.97555   |
| visionsympt | -.3557774 | .4184898  | -0.85 | 0.423        | -1.345349 .6337938   |
| steroids252 | .0586908  | .244369   | 0.24  | 0.817        | -.51915 .6365316     |
| _cons       | -8.729352 | 3.992941  | -2.19 | 0.065        | -18.17116 .7124539   |

```
metareg _ES imagestudy n era , wsse (_seES)
```

```

Meta-regression      Number of obs = 113
REML estimate of between-study variance  tau2 = .00468
% residual variation due to heterogeneity  I-squared_res = 52.02%
Proportion of between-study variance explained  Adj R-squared = 11.75%
Joint test for all covariates                 Model F(3,109) = 4.97
With Knapp-Hartung modification              Prob > F = 0.0028

```

| _ES        | Coef.     | Std. Err. | t     | P> t  | [95% Conf. Interval] |
|------------|-----------|-----------|-------|-------|----------------------|
| imagestudy | .1315084  | .036263   | 3.63  | 0.000 | .0596363 .2033804    |
| n          | -.0000108 | .0000131  | -0.83 | 0.409 | -.0000368 .0000151   |
| era        | .0110774  | .0251072  | 0.44  | 0.660 | -.0386843 .060839    |
| _cons      | .2382717  | .0226986  | 10.50 | 0.000 | .1932838 .2832596    |

```
. metareg _ES imagestudy n era avg_age , wsse (_seES)
```

```

Meta-regression      Number of obs = 73
REML estimate of between-study variance  tau2 = .004515
% residual variation due to heterogeneity  I-squared_res = 52.97%
Proportion of between-study variance explained  Adj R-squared = 19.03%
Joint test for all covariates                 Model F(4,68) = 3.28
With Knapp-Hartung modification              Prob > F = 0.0162

```

| _ES        | Coef.    | Std. Err. | t    | P> t  | [95% Conf. Interval] |
|------------|----------|-----------|------|-------|----------------------|
| imagestudy | .1115744 | .0484321  | 2.30 | 0.024 | .0149296 .2082191    |

```

      n | -.0000163   .000016   -1.02   0.311   -.0000483   .0000156
      era | .0048111   .0324969    0.15   0.883   -.0600355   .0696577
      avg_age | .0100658   .005383    1.87   0.066   -.0006758   .0208074
      _cons | -.4816891   .3886093   -1.24   0.219   -1.257147   .2937687

```

```

-----
. metareg _ES imagestudy n era avg_age fetomaratio , wsse (_seES)

```

```

Meta-regression                               Number of obs =      62
REML estimate of between-study variance       tau2           = .005038
% residual variation due to heterogeneity     I-squared_res = 56.85%
Proportion of between-study variance explained Adj R-squared  = 10.08%
Joint test for all covariates                 Model F(5,56)  = 2.49
With Knapp-Hartung modification              Prob > F       = 0.0420

```

```

-----
      _ES |      Coef.   Std. Err.      t    P>|t|     [95% Conf. Interval]
-----+-----
      imagestudy |   .0793995   .0567131     1.40   0.167    -0.0342106   .1930095
      n |  -.0000214   .0000174    -1.23   0.222    -0.0000562   .0000134
      era |   .0095294   .0363508     0.26   0.794    -0.0632899   .0823487
      avg_age |   .0169112   .0070417     2.40   0.020     .0028051   .0310174
      fetomaratio |  -.3010814   .2648558    -1.14   0.260    -0.8316513   .2294885
      _cons |  -.7775278   .5150593    -1.51   0.137    -1.809316   .2542599

```

```

-----
. metareg _ES imagestudy n era avg_age fetomaratio avglengthmm , wsse (_seES)

```

```

Meta-regression                               Number of obs =      29
REML estimate of between-study variance       tau2           = .005458
% residual variation due to heterogeneity     I-squared_res = 56.19%
Proportion of between-study variance explained Adj R-squared  = -42.90%
Joint test for all covariates                 Model F(6,22)  = 0.66
With Knapp-Hartung modification              Prob > F       = 0.6847

```

```

-----
      _ES |      Coef.   Std. Err.      t    P>|t|     [95% Conf. Interval]
-----+-----
      imagestudy |  -.0039082   .1161649    -0.03   0.973    -0.2448194   .237003
      n |  -.0000365   .0000545    -0.67   0.510    -0.0001496   .0000766
      era |  -.0279562   .0533419    -0.52   0.605    -0.1385806   .0826682
      avg_age |   .0085066   .0112448     0.76   0.457    -0.0148136   .0318268
      fetomaratio |  -.5488729   .3956106    -1.39   0.179    -1.369319   .2715732
      avglengthmm |   .0004405   .0035341     0.12   0.902    -0.0068889   .0077699
      _cons |   .017964   .9470775     0.02   0.985    -1.946154   1.982082

```

```

-----
. metareg _ES imagestudy n era avg_age fetomaratio avglengthmm visionsympt , wsse (_seES
> )

```

```

Meta-regression                               Number of obs =      13
REML estimate of between-study variance       tau2           = .000043
% residual variation due to heterogeneity     I-squared_res = 11.12%

```





## REFERENCES

1. Aranda-Valera IC, García Carazo S, Monjo Henry I, De Miguel Mendieta E. Diagnostic validity of Doppler ultrasound in giant cell arteritis. *Clinical and Experimental Rheumatology*. 2017; 35(suppl 103): p. 123-127.
2. Bharadwaj G, Ferris C, Lyall J. A 9-year retrospective analysis of 418 consecutive temporal artery biopsies (TAB): a surgical perspective of patients treated in a UK district general hospital referral service. *Oral Surgery*. 2017; 10(2): p. 67-73.
3. Bowling K, Rait J, Atkinson J, Srinivas G. Temporal artery biopsy in the diagnosis of giant cell arteritis: Does the end justify the means? *Annals Medicine and Surgery*. 2017; 20: p. 1-5.
4. Gajree S, Borocah S, Dhillon N, Goudie C, Smith C, Aspanali P, Dhillon B. Clinical Temporal artery biopsies in south-east Scotland: a five-year review. *Journal of the Royal College of Physicians of Edinburgh*. 2017; 47(2): p. 124-128.
5. Grossman C, Ben-Zvi I, Barshack I, Bornstein G. Association between specimen length and diagnostic yield of temporal. *Scandi J Rheumatology*. 2017; 46(3): p. 222-225.
6. Ing EB, Lahaie Luna G, Toren A, Ing R, Chen JJ, Arora N, Torun N, Jakpor OA, Fraser JA, Tyndel FJ, Sundaram AN, Liu X, Lam CT, Patel V, Weis E, Jordan D, Gilberg S, Pagnoux C, Ten Hove M. Multivariable prediction model for suspected giant cell arteritis: development and validation. *Clinical Ophthalmology*. 2017 Nov; 11: p. 2031-2042.
7. Papadakis M, Kaptanis S, Kokkori-Steinbrecher A, Floros N, Schuster F, Hübner G. Temporal artery biopsy in the diagnosis of giant cell arteritis: Bigger is not always better. *Am J Surg*. 2017; S0002-9610(17): p. 30967-4.
8. Ponte CB, Monti S, Singh S, Hutchings A, Diamantopoulos A, Dasgupta B, Schmidt WA, Luqmani RA. Histology findings in giant cell arteritis (GCA) and their relationship with the ultrasound results: analysis of data from the tabul study (temporal artery biopsy vs ultrasound in diagnosis of giant cell arteritis). *Annals Rheumatic Diseases*. 2017; 76(suppl 2): p. 318.

9. Rheaume M, Rebello R, Pagnoux C, Carette S, Clements-Baker M, Cohen-Hallaleh V, Doucette-Preville D, Jackson BS, Salama SS, Ioannidis G, Khalidi NA. High-Resolution Magnetic Resonance Imaging of Scalp Arteries for the Diagnosis of Giant Cell Arteritis: Results of a Prospective Cohort Study. *Arthritis & Rheumatology*. 2017; 69(1): p. 161-168.
10. Roncato C, Allix-Béguet C, Brottier-Mancini E, Gombert B, Denis G. Diagnostic performance of colour duplex ultrasonography along with temporal artery biopsy in suspicion of giant cell arteritis. *Clinical and Experimental Rheumatology*. 2017; 35(suppl 103): p. 119-122.
11. Tanveer R, Shaunak S, Chhetri S. Audit on efficacy of temporal artery biopsy (TAB) for giant cell arteritis (GCA) in Lancashire teaching hospital NHS Foundation Trust. *Journal of Neurology, Neurosurgery & Psychiatry*. 2017; 88(Suppl 1): p. A78.
12. Calamia KT, Mattson EL, Mazlumzadeh M, Michet CJ, Mertz LE, Hunder GG. Abstract 229 Trends in the use of temporal artery biopsy for the diagnosis of giant cell arteritis (GCA) : Experience in 2539 patients at 3 centers over 11 years. *J Clin Rheumatology*. 2006; 12(4): p. S73-74.
13. Cristaudo AT, Ryo Mizumoto R, Hendahewa R. The impact of temporal artery biopsy on surgical practice. *Annals of Medicine and Surgery*. 2016; 11: p. 47-51.
14. Frost A, Steele R, Qasem S. Single-Institution Experience with 696 Temporal Artery Biopsies for the Evaluation of Giant Cell Arteritis. *Amer J Clinical Pathology*. 2016; 146(suppl 1): p. S1-S126.
15. Hussain O, McKay A, Fairburn K, Doyle P, Orr R. Diagnosis of giant cell arteritis: when should we biopsy the temporal artery? *British Journal of Oral and Maxillofacial Surgery*. 2016; 54(3): p. 327-330.
16. Jones A, Li J, Li C. Laboratory Tests in Giant Cell Arteritis – Do They Make the Cut? *Arthritis Rheumatol*. 2016; 68(suppl 10).
17. Lariviere D, Benali K, Coustet B, Pasi N, Hyafil F, Klein I, Chauchard M, Alexandra JF, Goulenok T, Dossier A, Dieude P, Papo T, Sacre K. Positron emission tomography and computed tomography angiography for the diagnosis of giant cell arteritis. *Medicine*. 2016; 95(30): p. 1-4.
18. Luqmani R, Lee E, Singh S, Gillett M, Schmidt WA, Bradburn M, Dasgupta B, Diamantopoulos AP, Forrester-Barker W, Hamilton W, Masters S, McDonald B, McNally E, Pease C, Piper J, Salmon J, Wailoo A, Wolfe K, Hutchings A. The Role of Ultrasound Compared to Biopsy of Temporal Arteries in the Diagnosis and Treatment of Giant Cell Arteritis (TABUL): a diagnostic accuracy and cost-effectiveness study. *National Institute for Health Research Health Technology Assessment*. 2016; 20(90): p. 1-238.

19. Neale J, Barami T, Burns J, Moorthy A. Audit of Leicester guidelines on management of suspected giant cell arteritis and referral pathway for temporal artery biopsy. In Midland Rheumatology Society Spring Meeting 2016; 2016; Worcester.
20. Oh LJ, Wong E, Andrici J, McCluskey P, Smith JEH, Gill AJ. The full blood count as an ancillary test to support the diagnosis of giant cell arteritis. *Internal Medicine J.* 2017.
21. Taylor R, Veale B, Varley I, Orr R, Doyle P. An audit of the quality of temporal artery biopsies at Chesterfield Royal Hospital. *Int J Surg.* 2016; 36(suppl 1): p. S81.
22. Yousif A, Shiralkar S, Atukorale H, Douglas K, Erb N, John H, Pace A, Sandhu R, Klocke R. Suspected temporal arteritis - an audit of a patient pathway. In Midland Rheumatology Society Spring Meeting 2016; 2016; Worcester.
23. Au CP, Sharma NS, McCluskey P, Ghabrial R. Increase in the length of superficial temporal artery biopsy over 14years. *Clinical and Experimental Ophthalmology.* 2016; 44(7): p. 550-554.
24. Bateman M. An audit into the new temporal artery biopsy service provided by the Oral and Maxillofacial Surgery Department in the Great Western Hospital. *British Journal of Oral and Maxillofacial Surgery.* 2015; 53(10): p. e37-e38.
25. De Lott LB, Burke JF. Use of laboratory markers in deciding whether to perform temporal artery biopsy. *JAMA Ophthalmology.* 2015; 133(5): p. 605-606.
26. El-Dairi MA, Chang L, Proia AD, Cummings TJ, Stinnett SS, Bhatti MT. Diagnostic Algorithm for Patients With Suspected Giant Cell Arteritis. *J Neuroophthalmol.* 2015; 35(3): p. 246-53.
27. Fritzlen J, Younge B, Weyand CM, Hunder GG, Goronzy J, Warrington KJ, Maleszewski J. Second Temporal Artery Biopsies in Patients with Temporal Arteritis (TA). *Arthritis Rheumatol.* 2015; 67(suppl 10).
28. Germanò G, Muratore F, Cimino L, Lo Gullo A, Possemato N, Macchioni P, Cavazza A, Pipitone N, Boiardi L, Salvarani C. Is colour duplex sonography-guided temporal artery biopsy useful in the diagnosis of giant cell arteritis? A randomized study. *Rheumatology.* 2015; 54(3): p. 400-404.
29. Han S, Kapasi MS, Patel VR, Farmer JP, Blanco PL, Albreiki DH. Poster 231 Discordance Rates in Healing/Healed Arteritis in Temporal Artery Biopsies: The Role for Bilateral Biopsies. In North American Neuro-ophthalmology Society Meeting; 2015; San Diego, CA. p. 399.

30. Lally L, Pernis A, Narula N, Huang WT, Spiera R. Increased rho kinase activity in temporal artery biopsies from patients with giant cell arteritis. *Rheumatology*. 2015; 54(3): p. 554-558.
31. Le K, Bools LM, Lynn AB, Clancy TV, Hooks WB III, Hope WW. The effect of temporal artery biopsy on the treatment of temporal arteritis. *Amer J Surgery*. 2015; 209(2): p. 338-341.
32. McKay A, Hussey K, Stuart WP. Temporal artery biopsy – How can we improve performance? *The Surgeon*. 2015; 13(2): p. 73-76.
33. McMurrin AE, Boom SJ. Temporal artery biopsies: do they make the cut? *Scottish Medical J*. 2015; 60(1): p. 9-12.
34. Mohammad AJ, Nilsson J, Jacobsson LTH, Merkel PA, Turesson C. Incidence and mortality rates of biopsy-proven giant cell arteritis in southern Sweden. *Annals Rheumatic Diseases*. 2015; 74(6): p. 993-997.
35. Sharma A, Sagar V, Prakash M, Gupta V, Khaire N, Pinto B, Dhir V, Bal A, Aggarwal A, Kumar S, Sharma K, Rathi M, Das A, Singh R, Singh S, Gupta A. Giant cell arteritis in India: Report from a tertiary care center along with total published experience from India. *Neurology India*. 2015; 63(5): p. 681-686.
36. Siemonsen S, Brekenfeld C, Holst B, Kaufmann-Buehler AK, Fiehler J, Bley TA. 3T MRI reveals extra- and intracranial involvement in giant cell arteritis. *AJNR Am J Neuroradiol*. 2015 Jan; 36(1): p. 91-7.
37. Sloane J, Rice N, Kergozou E, Chanyarungrojn P, Walsh S. Temporal artery biopsy for giant cell arteritis: an audit of 471 cases – what have we learnt? *Br J Oral Maxillofacial Surgery*. 2015; 53(Suppl 1): p. S67.
38. Somogyi M, Hale S, Yoo DK, Shayesteh Y. Final Diagnosis in Headache Patients Following Temporal Artery Biopsy. *Investigative Ophthalmology & Visual Science*. 2015; 56(7): p. 5557.
39. Stacy RC, Gilbert AL, Rizzo JF III. Correlation of clinical profile and specific histopathological features of temporal artery biopsies. *Journal of Neuro-Ophthalmology*. 2015; 35(2): p. 127-133.
40. Sutton L, O'Hara H, Fernandez C, Das S. 5-year retrospective audit of temporal artery biopsies. *Int J Surg*. 2015; 23(suppl 1): p. s130.
41. Cavazza A, Muratore F, Boiardi L, Restuccia G, Pipitone N, Pazzola G, Tagliavini E, Ragazzi M, Rossi G, Salvarani C. Inflamed temporal artery: histologic findings in 354 biopsies, with clinical correlations. *Amer J Surgical Pathology*. 2014; 38(10): p. 1360-1370.

42. Croft AP, Thompson N, Duddy MJ, Barton C, Khattak F, Mollan SP, Jobanputra P. Cranial ultrasound for the diagnosis of giant cell arteritis. A retrospective cohort study. *J R Coll Physicians Edinb*. 2015; 45(4): p. 268-72.
43. Kaptanis S, Perera JK, Halkias C, Caton N, Alarcon L, Vig S. Temporal artery biopsy size does not matter. *Vascular*. 2014; 22(6): p. 406-410.
44. Klink T, Geiger J, Both M, Ness T, Heinzelmann S, Reinhard M, Holl-Ulrich K, Duwendag D, Vaith P, Bley TA. Giant cell arteritis: diagnostic accuracy of MR imaging of superficial cranial arteries in initial diagnosis-results from a multicenter trial. *Radiology*. 2014; 273(3): p. 844-852.
45. Al-Mossawi M, Munir H, Kyle MV. SAT0160 Setting Up an Acute Giant Cell Arteritis Referral Service: Experience of 1st Seventeen Months of Patients. *Annals Rheumatic Diseases*. 2013; 72(suppl 3): p. A363.
46. González-López JJ, González-Moraleja J, Burdaspal-Moratilla A, Rebolleda G, Núñez-Gómez-Álvarez MT, Muñoz-Negrete FJ. Factors associated to temporal artery biopsy result in suspects of giant cell arteritis: a retrospective, multicenter, case-control study. *Acta Ophthalmologica*. 2013; 91(8): p. 763-768.
47. Ibbett I, Foote A, Jeremiah J, Leech M. Clinical predictors of positive temporal artery biopsy at a tertiary centre. *Internal Medicine Journal*. 2013; 43(suppl 2): p. 21.
48. Kizza K, Murchison AP, Dai Y, Bilyk JR, Eagle RC Jr, Sergott R, Savino PJ. Giant cell arteritis incidence: analysis by season and year in mid-Atlantic United States. *Clin Exp Ophthalmol*. 2013 Aug; 41(6): p. 577-81.
49. Pieri A, Milligan R, Hegde V, Hennessy C. Temporal artery biopsy: are we doing it right? *Int J Health Care Qual Assur*. 2013; 26(6): p. 559-63.
50. Suelves AM, España-Gregori E, Aviñó J, Rohrweck S, Díaz-Llopis M. Analysis of factors that determine the diagnostic yield of temporal artery biopsy. *Archivos de la Sociedad Espanola de Oftalmologia*. 2013; 88(4): p. 127-129.
51. Yates M, Mukhtyar C, Igali L, Watts R, MacGregor A. SAT0153 Giant Cell Arteritis - Incidence and Mortality. *Annals Rheumatic Diseases*. 2014; 72(suppl 3): p. A633-A634.
52. Avitabile T, Castiglione F, Bonfiglio V, Reibaldi M, Buccoliero D, La Bruna M, Reibaldi A. The role of ultrasound biomicroscopy in the diagnosis of temporal arteritis. *Acta Clin Croat*. 2012; 51(Suppl 1): p. 31-35.

53. Bury D, Joseph J, Dawson TP. Does preoperative steroid treatment affect the histology in giant cell (cranial) arteritis? *J Clinical Pathology*. 2012; 65(12): p. 1138-1140.
54. Hassouna A, Khan A, Qureshi A, Brar A. Giant cell arteritis; redefining the role of temporal artery biopsy (TAB), Abstract 0518. *Int J Surg*. 2012; 10(8): p. S105.
55. Pfenninger L, Horst A, Stuckmann G, Flury R, Stürmer J. Comparison of histopathological findings with duplex sonography of the temporal arteries in suspected giant cell arteritis. *Klin Monbl Augenheilkd*. 2012 Apr; 229(4): p. 369-73.
56. Quinn EM, Kearney DE, Kelly J, Keohane C, Redmond HP. Temporal artery biopsy is not required in all cases of suspected giant cell arteritis. *Annals Vascular Surgery*. 2012; 26(5): p. 649-654.
57. Saedon H, Saedon M, Goodyear S, Papettas T, Marshall C. Temporal artery biopsy for giant cell arteritis: retrospective audit. *JRSM Short Rep*. 2012 Oct; 3(10): p. 73.
58. Thomassen I, den Brok AN, Konings CJ, Nienhuijs SW, van de Poll MC. Steroid use is associated with clinically irrelevant biopsies in patients with suspected giant cell arteritis. *American Surgeon*. 2012; 78(12): p. 1362-1368.
59. Abdul-Rahman AM, Moltano ACB, Bevin TH. The epidemiology of giant cell arteritis in Otago, New Zealand: A 9-year analysis. *New Zealand Medical J*. 2011 Feb; 124(1329): p. 44-52.
60. Bartlett AM, Welsh CT. Biopsy negative temporal arteries. *Laboratory Investigation*. 2011; 91: p. 386A.
61. Brunsó J, Pijoan JI, Jauregi M, Bidaguren A, Gasnault V, Santiago K, Margallo L, Andikoetxea B, Alvarez J, Martín JC, Barbier L, Arteagoitia MI, Santamaría G, Santamaría J. Length of superficial temporal artery biopsies and diagnostic sensitivity for giant cell arteritis. *Int J Oral and Maxillofacial Surgery*. 2011; 40(10): p. 1165-1166.
62. Goslin BJ, Chung MH. Temporal artery biopsy as a means of diagnosing giant cell arteritis: is there over-utilization? *The American Surgeon*. 2011; 77(9): p. 1158-1160.
63. Lugo JZ, Deitch JS, Yu A, Jang JH, Patel R, Slova D, Lantis J, Leitman IM. Demographic and laboratory data may predict positive temporal artery biopsy. *J Surg Res*. 2011; 170(2): p. 332-5.

64. Patel M, Goble F, Walsh S. Review of temporal artery biopsies taken over a 10 year period. *Br J Oral and Maxillofacial Surgery*. 2011; 49(suppl 1): p. s89.
65. Tornabene SV, Hilsinger R, Cruz RM. Evaluating the Usefulness and Timing of the Temporal Artery Biopsy for the Diagnosis of Giant Cell Arteritis. *Laryngoscope*. 2011; 121(suppl 5): p. 5264.
66. Verner-Cole E, Divatia M, Gombos D, Chevez-Barrios P. Use of special stains and immunohistochemistry to diagnose giant cell arteritis. *Laboratory Investigation*. 2011; 91: p. 388A.
67. Walvick MD, Walvick MP. Giant cell arteritis: laboratory predictors of a positive temporal artery biopsy. *Ophthalmology*. 2011; 118(6): p. 1201-1204.
68. Ypsilantis E, Courtney ED, Chopra N, Karthikesalingam A, Eltayab M, Katsoulas N, Tang TY, Ball RY. Importance of specimen length during temporal artery biopsy. *Br J Surgery*. 2011; 98(11): p. 1556-1560.
69. Cowey S, Reynolds C, Joglekar S, Pereira JH. Does Temporal Artery Biopsy (TAB) Influence Management of Giant Cell Arteritis (GCA)? *International J Surgery*. 2010; 8(7): p. 536.
70. Famorca L, Khalidi N. Temporal Artery Biopsy. Does Length Really Matter? *J Rheumatology*. 2010; 37: p. 1325-1326.
71. Maldini C, Dépinay-Dhellemmes C, Tra TT, Chauveau M, Allanore Y, Gossec L, Terrasse G, Guillevin L, Coste J, Mahr A. Limited value of temporal artery ultrasonography examinations for diagnosis of giant cell arteritis: analysis of 77 subjects. *J Rheumatology*. 2010; 37(11): p. 2326-2330.
72. Manjuka R, David TAH. Temporal artery biopsies: a fresh perspective. *ANZ J Surgery*. 2010; 80(7-8): p. 479-480.
73. Breuer GS, Neshet G, Neshet R. Rate of discordant findings in bilateral temporal artery biopsy to diagnose giant cell arteritis. *J Rheumatology*. 2009; 36(4): p. 794-796.
74. Mader TH, Werner RP, Chamberlain DG, Doornbos D. Giant cell arteritis in Alaska Natives. *Can J Ophthalmology*. 2009; 44(1): p. 53-56.
75. Marí B, Monteagudo M, Bustamante E, Pérez J, Casanovas A, Jordana R, Tolosa C, Oristrell J. Analysis of temporal artery biopsies in an 18-year period at a community hospital. *Eur J Internal Medicine*. 2009; 20(5): p. 533-536.



76. Zhou L, Luneau K, Weyand CM, Biousse V, Newman NJ, Grossniklaus HE. Clinicopathologic correlations in giant cell arteritis: a retrospective study of 107 cases. *Ophthalmology*. 2009; 116(8): p. 1574-1580.
77. Bley TA, Reinhard M, Hauenstein C, Markl M, Warnatz K, Hetzel A, Uhl M, Vaith P, Langer M. Comparison of duplex sonography and high-resolution magnetic resonance imaging in the diagnosis of giant cell (temporal) arteritis. *Arthritis Rheum*. 2008; 58(8): p. 2574-2578.
78. Cetinkaya A, Brannan PA. Ptosis repair options and algorithm. *Current Opinion Ophthalmology*. 2008; 19(5): p. 428-434.
79. Moutray TN, Williams MA, Best JL. Suspected giant cell arteritis: a study of referrals for temporal artery biopsy. *Can J Ophthalmology*. 2008; 43(4): p. 445-448.
80. Sintler M, Garnham A, Mahmood A, Rittoo D, Khaira HS, Vohra RK. Temporal artery biopsy: impact on the clinical management of patients. *Indian J Surgery*. 2008; 70(2): p. 73-76.
81. Chaudhry IA, Shamsi FA, Elzaridi E, Arat YO, Bosley TM, Riley FC. Epidemiology of giant-cell arteritis in an Arab population: a 22-year study. *Br J Ophthalmology*. 2007; 91(6): p. 15-18.
82. Ramstead CL, Patel AD. Giant cell arteritis in a neuro-ophthalmology clinic in Saskatoon, 1998-2003. *Can J Ophthalmol*. 2007; 42(2): p. 295-298.
83. Rodríguez-Pla A, Rosselló-Urgell J, Bosch-Gil JA, Huguet-Redecilla P, Vilardell-Tarres M. Proposal to decrease the number of negative temporal artery biopsies. *Scand J Rheumatology*. 2007; 36(2): p. 111-118.
84. Sharma NS, Ooi JL, McGarity BH, Vollmer-Conna U, McCluskey P. The length of superficial temporal artery biopsies. *ANZ J Surg*. 2007; 77(6): p. 437-439.
85. Zaragoza García JM, Plaza Martínez A, Briones Estébanez JL, Martínez Parreño C, Gómez Palonés FJ, Ortiz Monzón E. Value of the Doppler-ultrasonography for the diagnosis of temporal arteritis. *Medicina Clinica*. 2007; 129(12): p. 451-453.
86. Davies C, Frost B, Eshan O, McLain AD, Shandall A. Temporal artery biopsy... Who needs one? *Postgraduate Medical J*. 2006; 82(969): p. 476-478.

87. Karahaliou M, Vaiopoulos G, Papaspyrou S, Kanakis MA, Revenas K, Sfikakis PP. Colour duplex sonography of temporal arteries before decision for biopsy: a prospective study in 55 patients with suspected giant cell arteritis. *Arthritis research and therapy*. 2006; 8(4): p. R116.
88. Lenton J, Donnelly R, Nash JR. Does temporal artery biopsy influence the management of temporal arteritis? *QJM*. 2006; 99(1): p. 33-36.
89. Mahr A, Saba M, Kambouchner M, Polivka M, Baudrimont M, Brochériou I, Coste J, Guillevin L. Temporal artery biopsy for diagnosing giant cell arteritis: the longer, the better? *Annals Rheumatic Diseases*. 2006; 65(6): p. 826-828.
90. Su GW, Foroozan R, Yen MT. Quantitative analysis of temporal artery contraction after biopsy for evaluation of giant cell arteritis. *Can J Ophthalmology*. 2006; 41(4): p. 500-503.
91. Chong EW, Robertson AJ. Is temporal artery biopsy a worthwhile procedure? *ANZ J Surgery*. 2005; 75(6): p. 388-391.
92. Taylor-Gjevre R, Vo M, Shukla D, Resch L. Temporal artery biopsy for giant cell arteritis. *J Rheumatology*. 2005; 32(7): p. 1279-1282.
93. Vianna RN, Mansour M, Ozdal PC, Souza Filho JP, Bakalian S, Saraiva VS, Deschenes J, Burnier MN Jr. The role of ultrasound biomicroscopy in predicting the result of temporal artery biopsy in temporal arteritis patients: a preliminary study. *Eur J Ophthalmol*. 2005; 15(6): p. 655-659.
94. Reinhard M, Schmidt D, Hetzel A. Color-coded sonography in suspected temporal arteritis-experiences after 83 cases. *Rheumatology international*. 2004; 24(6): p. 340-346.
95. Romera-Villegas A, Vila-Coll R, Poca-Dias V, Cairols-Castellote MA. The role of color duplex sonography in the diagnosis of giant cell arteritis. *J Ultrasound in Medicine*. 2004; 23(11): p. 1493-1498.
96. Varma D, O'Neill D. Quantification of the role of temporal artery biopsy in diagnosing clinically suspected giant cell arteritis. *Eye*. 2004; 18(4): p. 384-348.
97. Younge BR, Cook BE Jr, Bartley GB, Hodge DO, Hunder GG. Initiation of glucocorticoid therapy: before or after temporal artery biopsy? *Mayo Clinic Proceedings*. 2004; 79(4): p. 483-491.
98. Hall JK, Volpe NJ, Galetta SL, Liu GT, Syed NA, Balcer LJ. The role of unilateral temporal artery biopsy. *Ophthalmology*. 2003; 110(3): p. 543-548.

99. Murgatroyd H, Nimmo M, Evans A, MacEwen C. The use of ultrasound as an aid in the diagnosis of giant cell arteritis: a pilot study comparing histological features with ultrasound findings. *Eye*. 2003; 17(3): p. 415-419.
100. Dalbeth N, Lynch N, McLean L, McQueen F, Zwi J. Audit of the management of suspected giant cell arteritis in a large teaching hospital. *Internal Medicine Journal*. 2002; 32(7): p. 315-319.
101. Lesar CJ, Meier GH, DeMasi RJ, Sood J, Nelms CR, Carter KA, Gayle RG, Parent FN, Marcinczyk MJ. The utility of color duplex ultrasonography in the diagnosis of temporal arteritis. *J Vasc Surg*. 2002; 36(6): p. 1154-1160.
102. Mohamed MS, Bates T. Predictive clinical and laboratory factors in the diagnosis of temporal arteritis. *Annals of the Royal College Surgeons of England*. 2002; 84(1): p. 7-9.
103. Neshar G, Shemesh D, Mates M, Sonnenblick M, Abramowitz HB. The predictive value of the halo sign in color Doppler ultrasonography of the temporal arteries for diagnosing giant cell arteritis. *J Rheumatology*. 2002; 29(6): p. 1224-1226.
104. Ray-Chaudhuri N, Kiné DA, Tijani SO, Parums DV, Cartlidge N, Strong NP, Dayan MR. Effect of prior steroid treatment on temporal artery biopsy findings in giant cell arteritis. *Br J Ophthalmol*. 2002 May; 86(5): p. 530-2.
105. Schmidt WA, Gromnica-Ihle E. Incidence of temporal arteritis in patients with polymyalgia rheumatica: a prospective study using colour Doppler ultrasonography of the temporal arteries. *Rheumatology*. 2002; 41(1): p. 46-52.
106. Liu NH, LaBree LD, Feldon SE, Rao NA. The epidemiology of giant cell arteritis : a 12-year retrospective study. *Ophthalmology*. 2001; 108(6): p. 1145-1149.
107. Chakrabarty A, Franks AJ. Temporal artery biopsy: is there any value in examining biopsies at multiple levels? *J Clinical Pathology*. 2000; 53(2): p. 131-136.
108. Danesh-Meyer H, Savino PJ, Eagle RC, Kubis KC, Sergott RC. Low diagnostic yield with second biopsies in suspected giant cell arteritis. *J Neuro-Ophthalmology*. 2000; 20(3): p. 213-215.
109. Pless M, Rizzo JF 3rd, Lamkin JC, Lessell S. Concordance of bilateral temporal artery biopsy in giant cell arteritis. *Journal of neuro-ophthalmology*. 2000; 20(3): p. 216-218.
110. Poller DN, van Wyk Q, Jeffrey MJ. The importance of skip lesions in temporal arteritis. *J Clin Pathology*. 2000; 53(2): p. 137-139.

111. Albertini JG, Ramsey ML, Marks VJ. Temporal artery biopsy in a dermatologic surgery practice. *Dermatol Surg.* 1999 Jun; 25(6): p. 501-8.
112. Boyev LR, Miller NR, Green WR. Efficacy of unilateral versus bilateral temporal artery biopsies for the diagnosis of giant cell arteritis. *Amer J Ophthalmology.* 1999; 128(2): p. 211-215.
113. Morales-Angulo C, Calvo-Alen J, Tomas Bezos J, Acinas O, Garcia Mantilla J, Carrera F. [Biopsy of the temporal artery. Experience with the use of a protocol at an ENT department]. *Acta Otorrinolaringol Esp.* 1999; 50(1): p. 81-3.
114. Durling B, Toren A, Patel V, Gilberg S, Weis E, Jordan D. Incidence of discordant temporal artery biopsy in the diagnosis of giant cell arteritis. *Can J Ophthalmol.* 2014; 49(2): p. 157-61.
115. Toren A, Weis E, Patel V, Monteith B, Gilberg S, Jordan D. Clinical predictors of positive temporal artery biopsy. *Can J Ophthalmol.* 2016 Dec; 51(6): p. 476-481.
116. Weis E, Toren A, Jordan D, Patel V, Gilberg S. Development of a predictive model for temporal artery biopsies. *Can J Ophthalmol.* 2017 June; 52(6): p. 599-605.
117. Knecht PB, Bachmann LM, Thiel MA, Landau K, Kaufmann C. Ocular pulse amplitude as a diagnostic adjunct in giant cell arteritis. *Eye (London).* 2015 Jul; 29(7): p. 860-5.
118. García Carazo S, De Miguel E, Castillo C, Alcocer Amores P, Martin Mola E. SAT0522 Value of the Doppler-Ultrasonography for the Diagnosis of Temporal Arteritis. *Annals of Rheumatic Dis.* 2013; 72: p. A758.
119. Singh S, Hutchings A, Foresster-Barker W, Dasgupta B, Diamantopoulos AP, Lanyon P, Magliano M, McDonald B, Wolfe K, Luqmani R. Abstract 793 Preliminary Analysis of Histological Findings in Diagnosis of Giant Cell Arteritis Biopsy Positive Patients. *Arthritis and Rheumatology.* 2014; 66: p. S347-S348.
120. Murchison AP, Gilbert ME, Bilyk JR, Eagle RC Jr, Pueyo V, Sergott RC, Savino PJ. Validity of the American College of Rheumatology criteria for the diagnosis of giant cell arteritis. *Am J Ophthalmol.* 2012 Oct; 154(4): p. 722-9.
121. Bley TA, Wieben O, Uhl M, Thiel J, Schmidt D, Langer M. High-resolution MRI in giant cell arteritis: imaging of the wall of the superficial temporal artery. *AJR Am J Roentgenol.* 2005 Jan; 184(1): p. 283-7.

122. Kermani TA, Schmidt J, Crowson CS, Ytterberg SR, Hunder GG, Matteson EL, Warrington KJ. Utility of erythrocyte sedimentation rate and C-reactive protein for the diagnosis of giant cell arteritis. *Semin Arthritis Rheum.* ; 41(6): p. 866-71.
123. Chandran AK, Udayakumar PD, Crowson CS, Warrington KJ, Matteson EL. The incidence of giant cell arteritis in Olmsted County, Minnesota, over a 60-year period 1950-2009. *Scand J Rheumatol.* 2015; 44(3): p. 215-8.
124. Udayakumar PD, Crowson C, Warrington KJ, Matteson EL. Update on incidence of giant cell arteritis in the current era of advanced diagnostic imaging. *Rheumatology.* 2014; 53(suppl 2): p. i16.
125. Rieck KL, Kermani TA, Thomsen KM, Harmsen WS, Karban MJ, Warrington KJ. Evaluation for clinical predictors of positive temporal artery biopsy in giant cell arteritis. *J Oral Maxillofacial Surg.* 2011; 69(1): p. 36-40.
126. Barendregt JJ, Doi SA. *MetaXL User Guide Version 5.3.* pdf. Sunrise Beach: EpiGear International PTY Ltd; 2016.
